# Supplementary figures and images for: Social interactions drive efficient foraging and income equality in groups of fish
Source: eLife journal article supplement (doi:10.7554/elife.56196), 2020-08-24

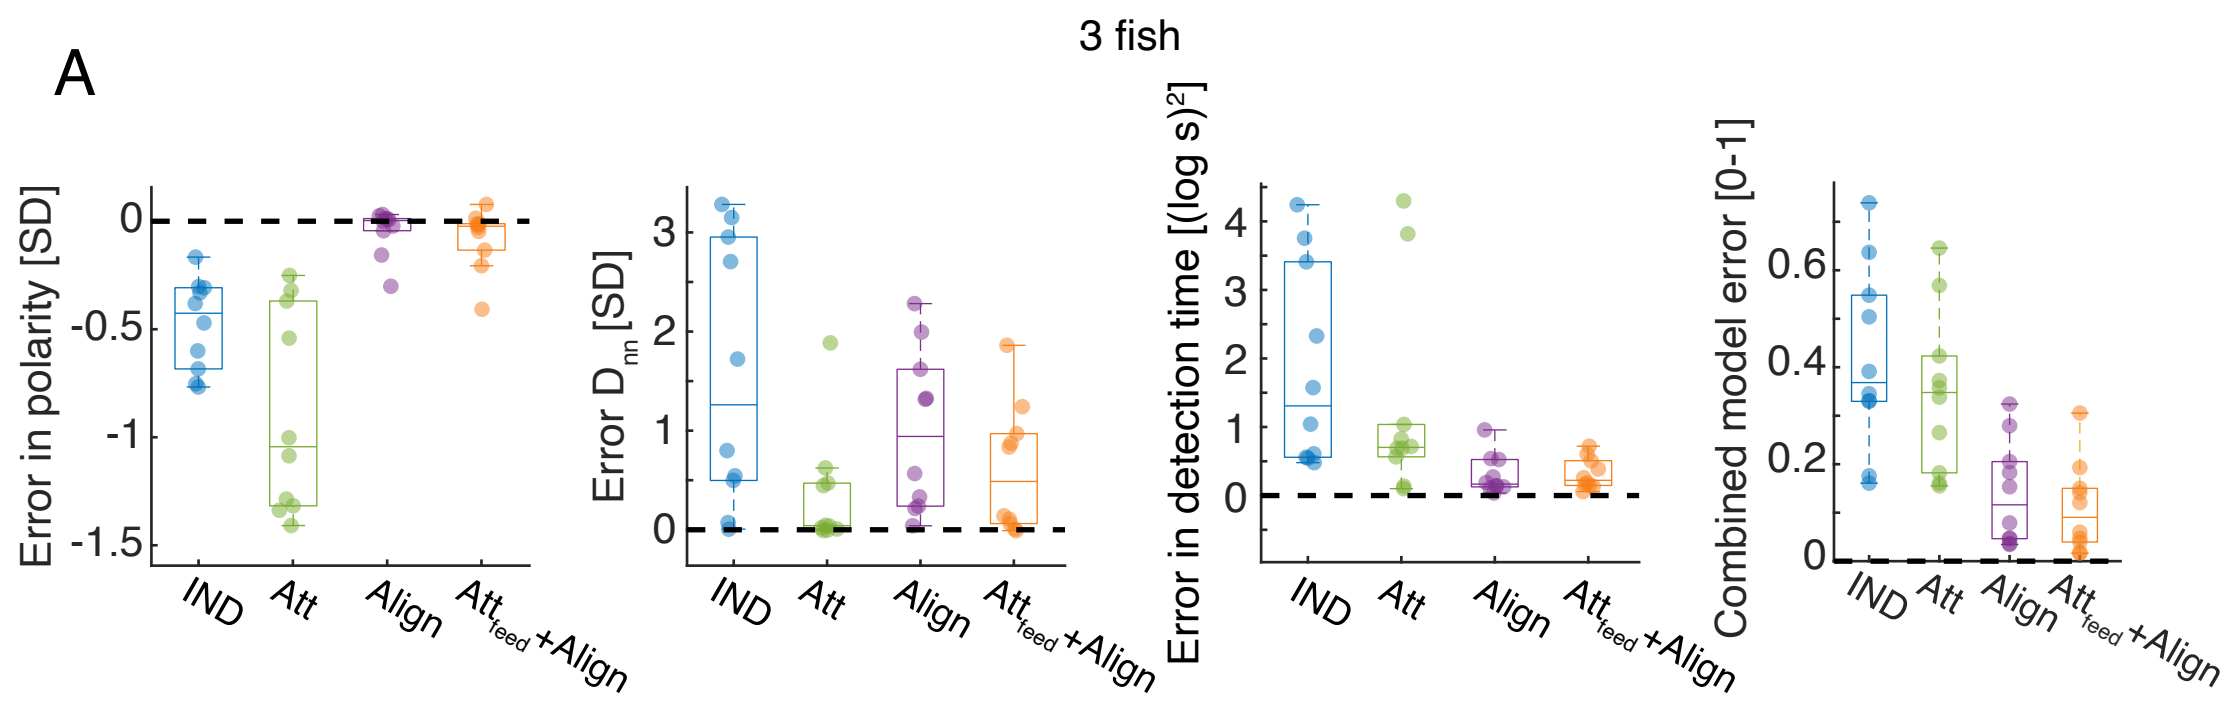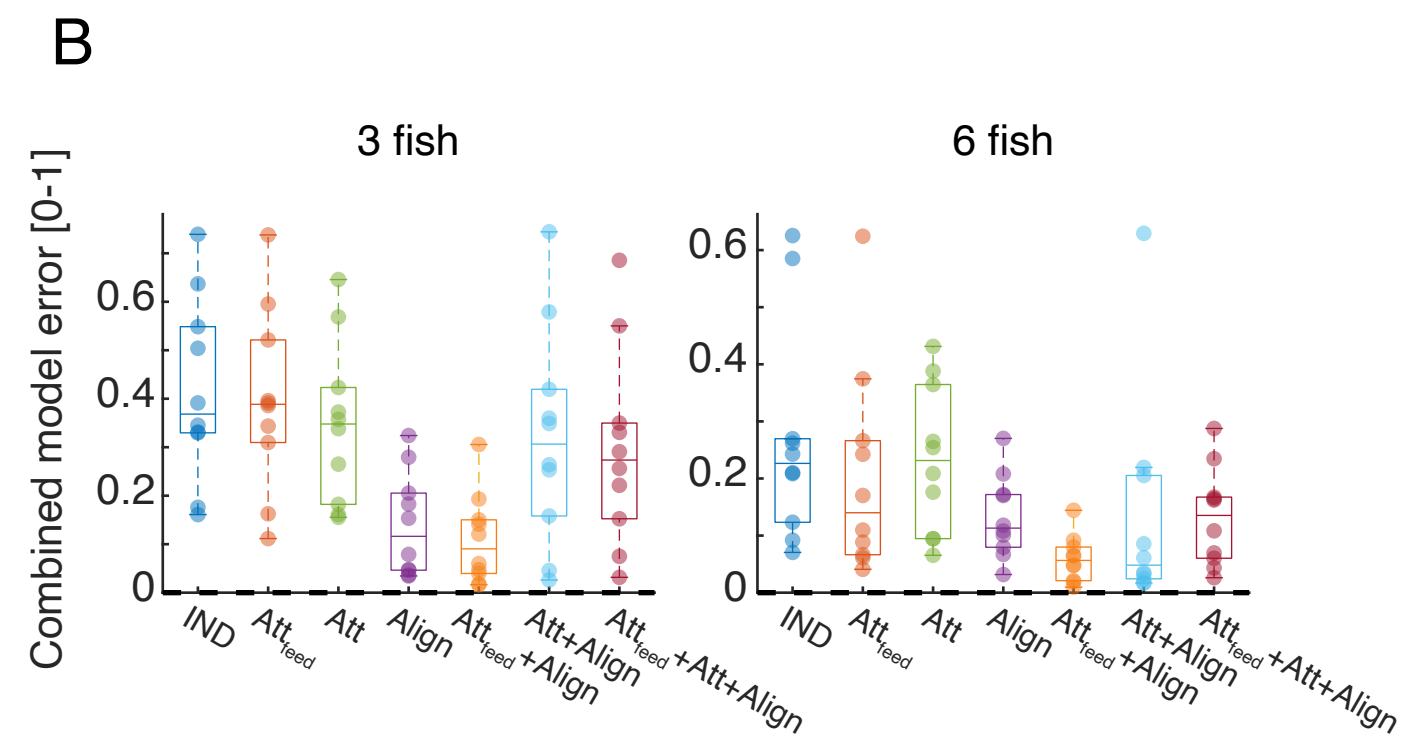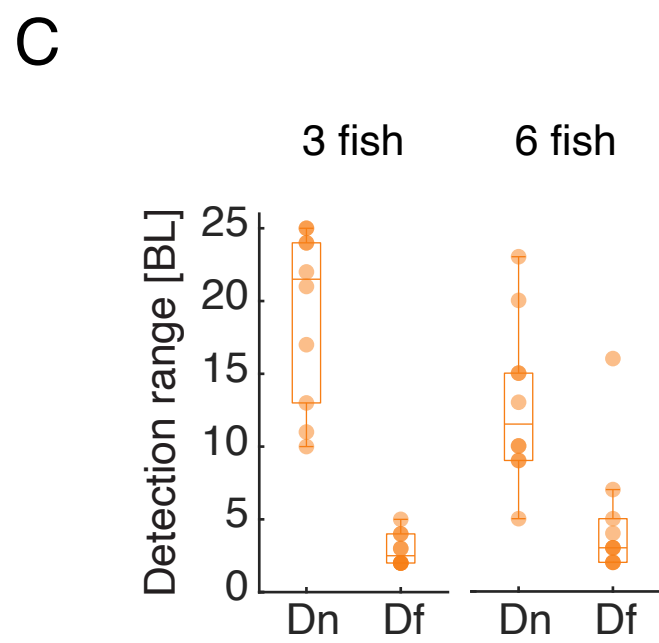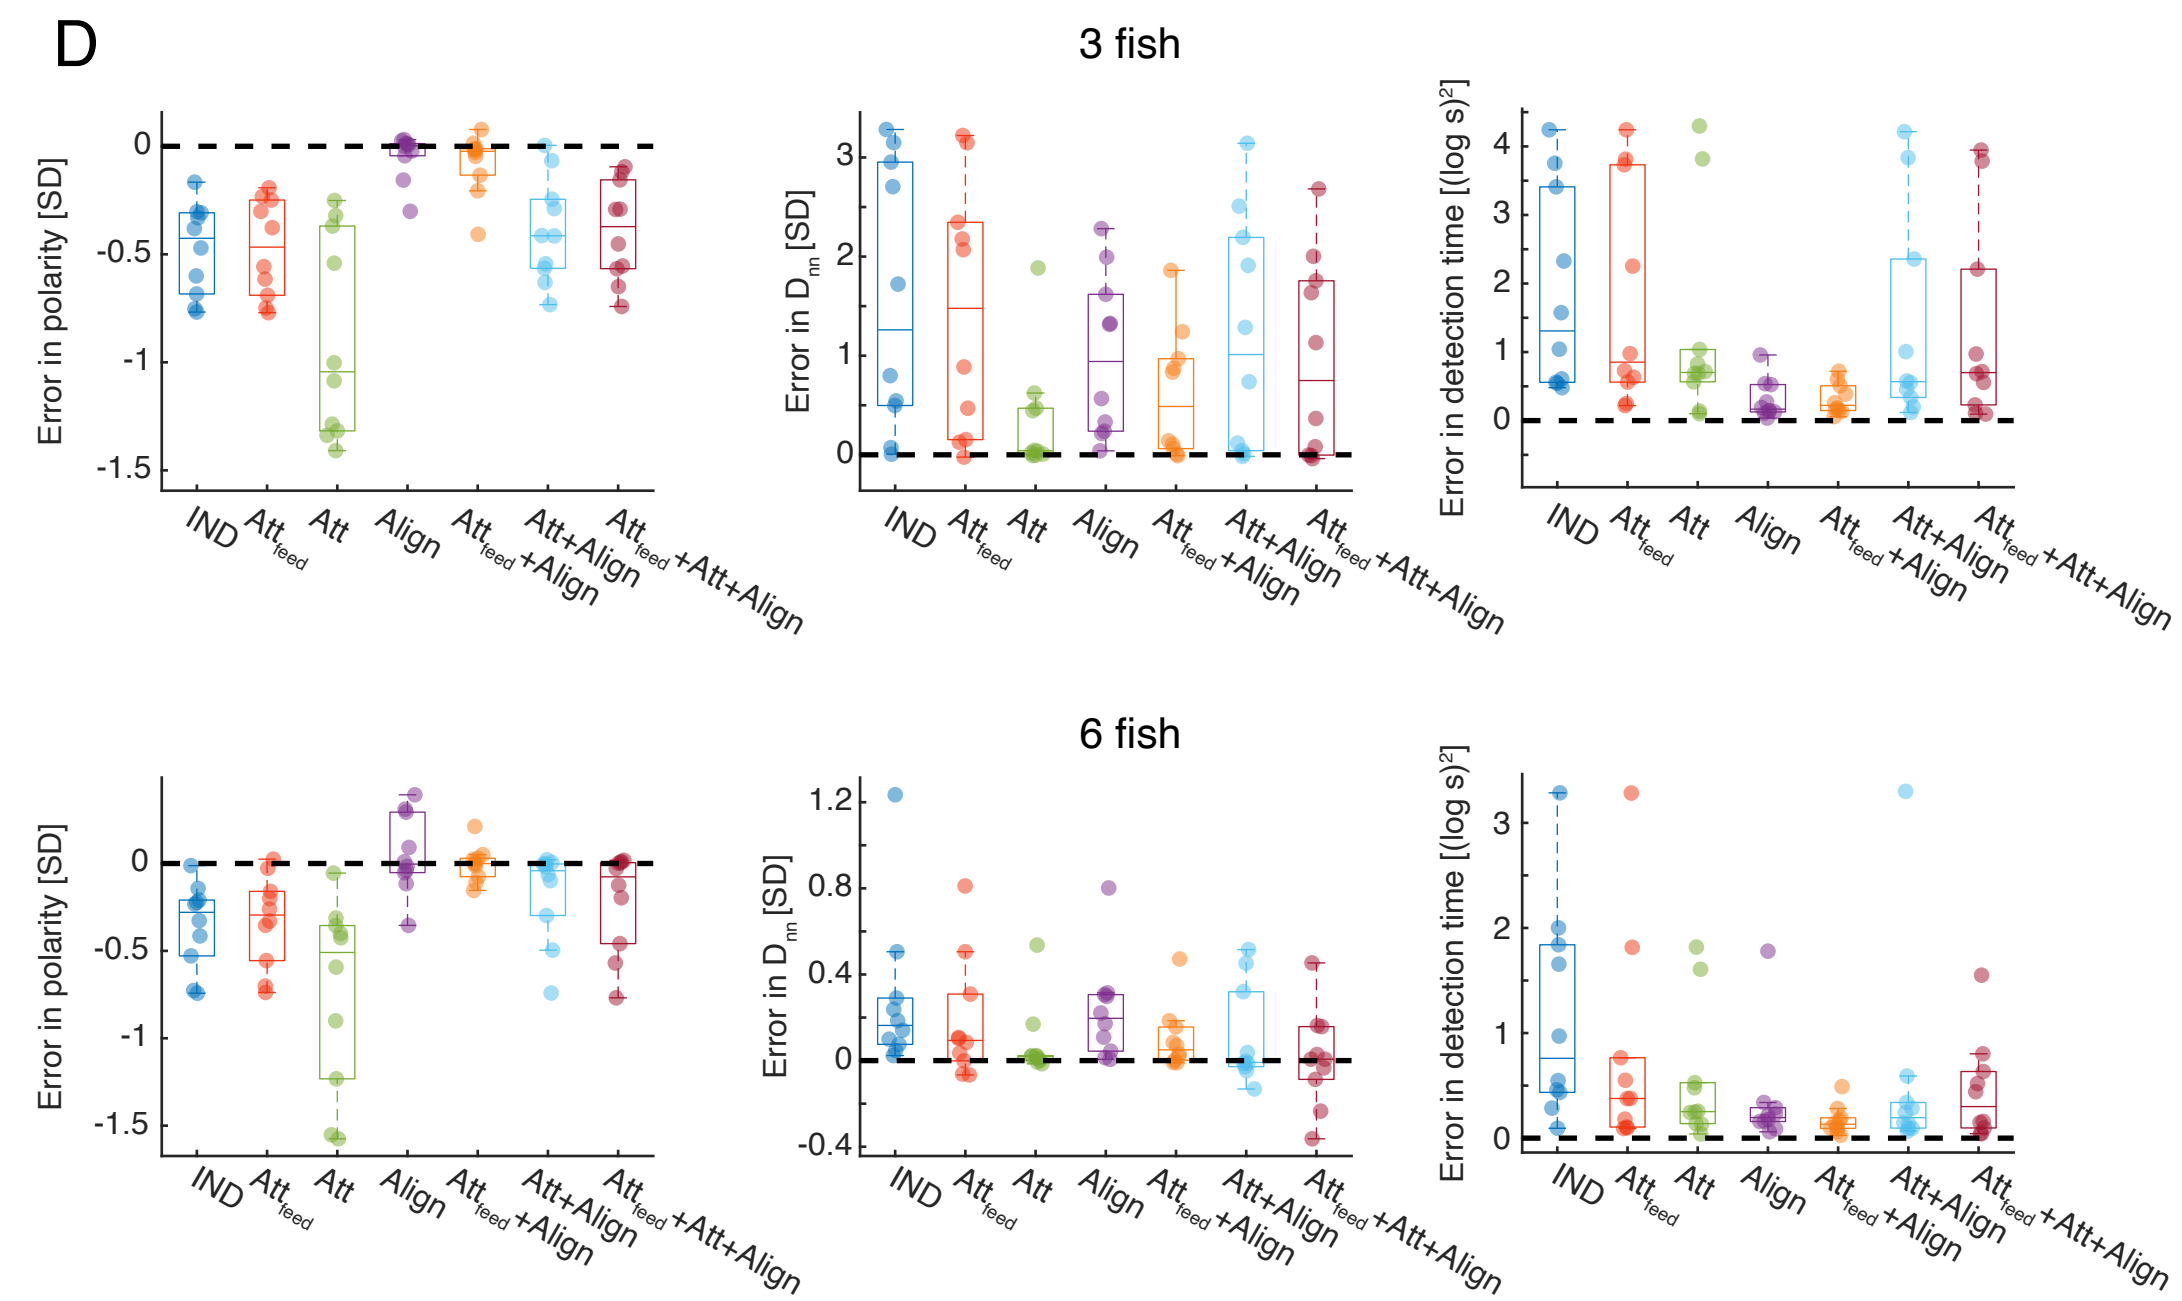

Supplement: supp [file elife-56196-supp-v1.zip]

Att<sub>feed</sub> model:

A

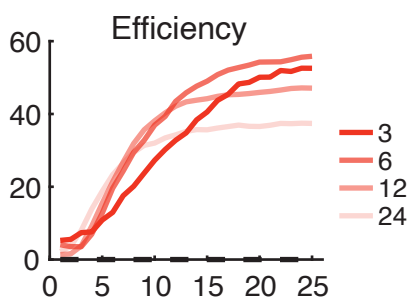

B

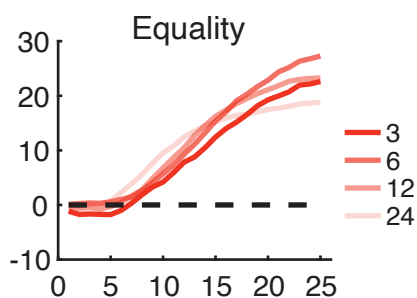

Change in consumption rate [%]

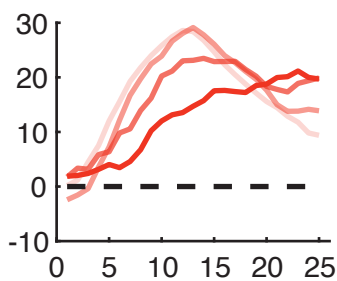

Change in equality [%]

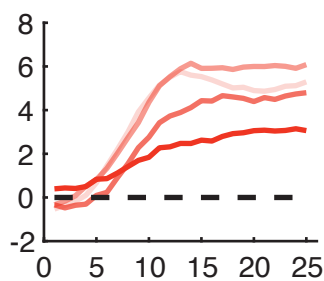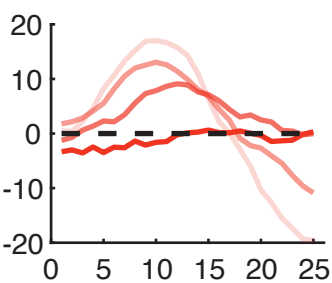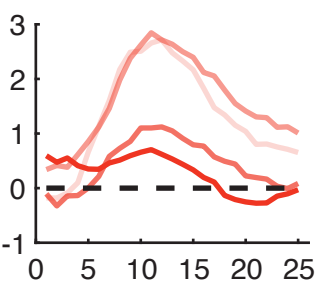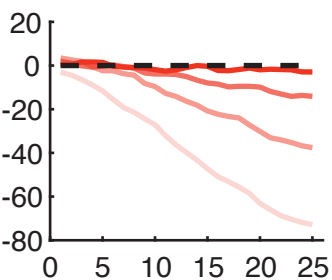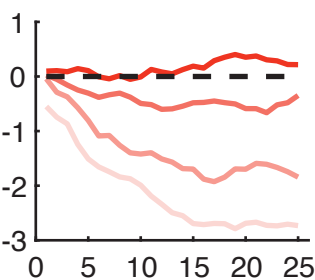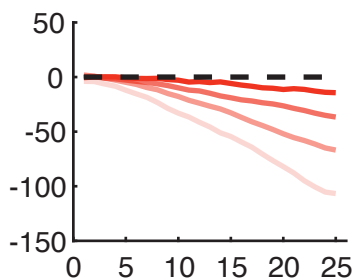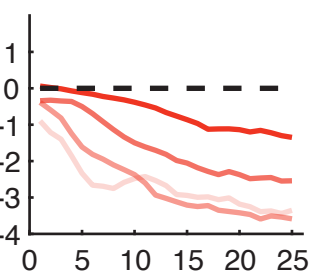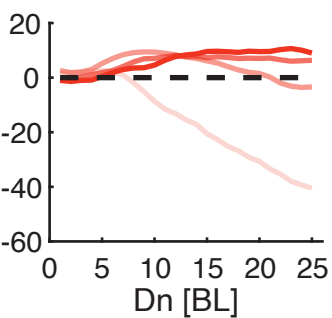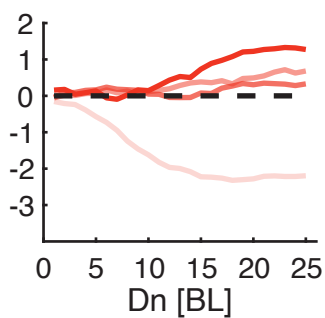

Dn [BL]

Dn [BL]

Supplement: supp [file elife-56196-supp-v1.zip]

A

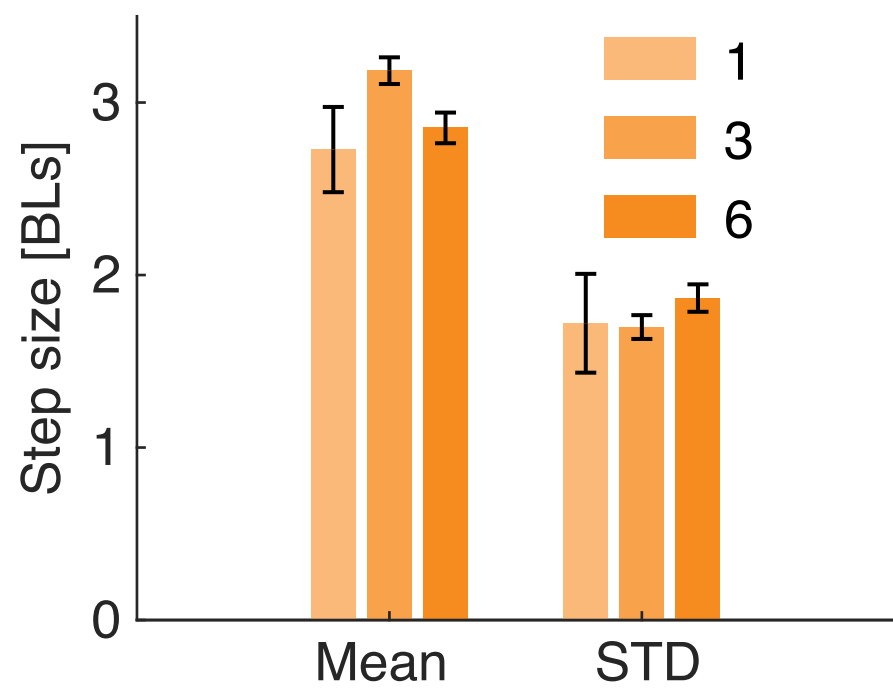

B

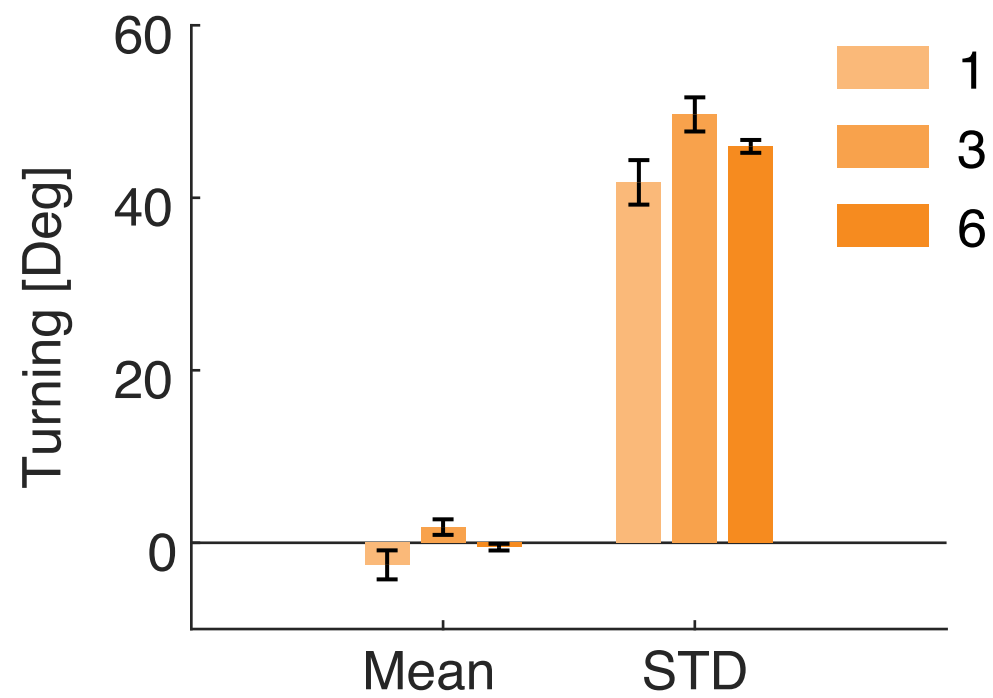

C

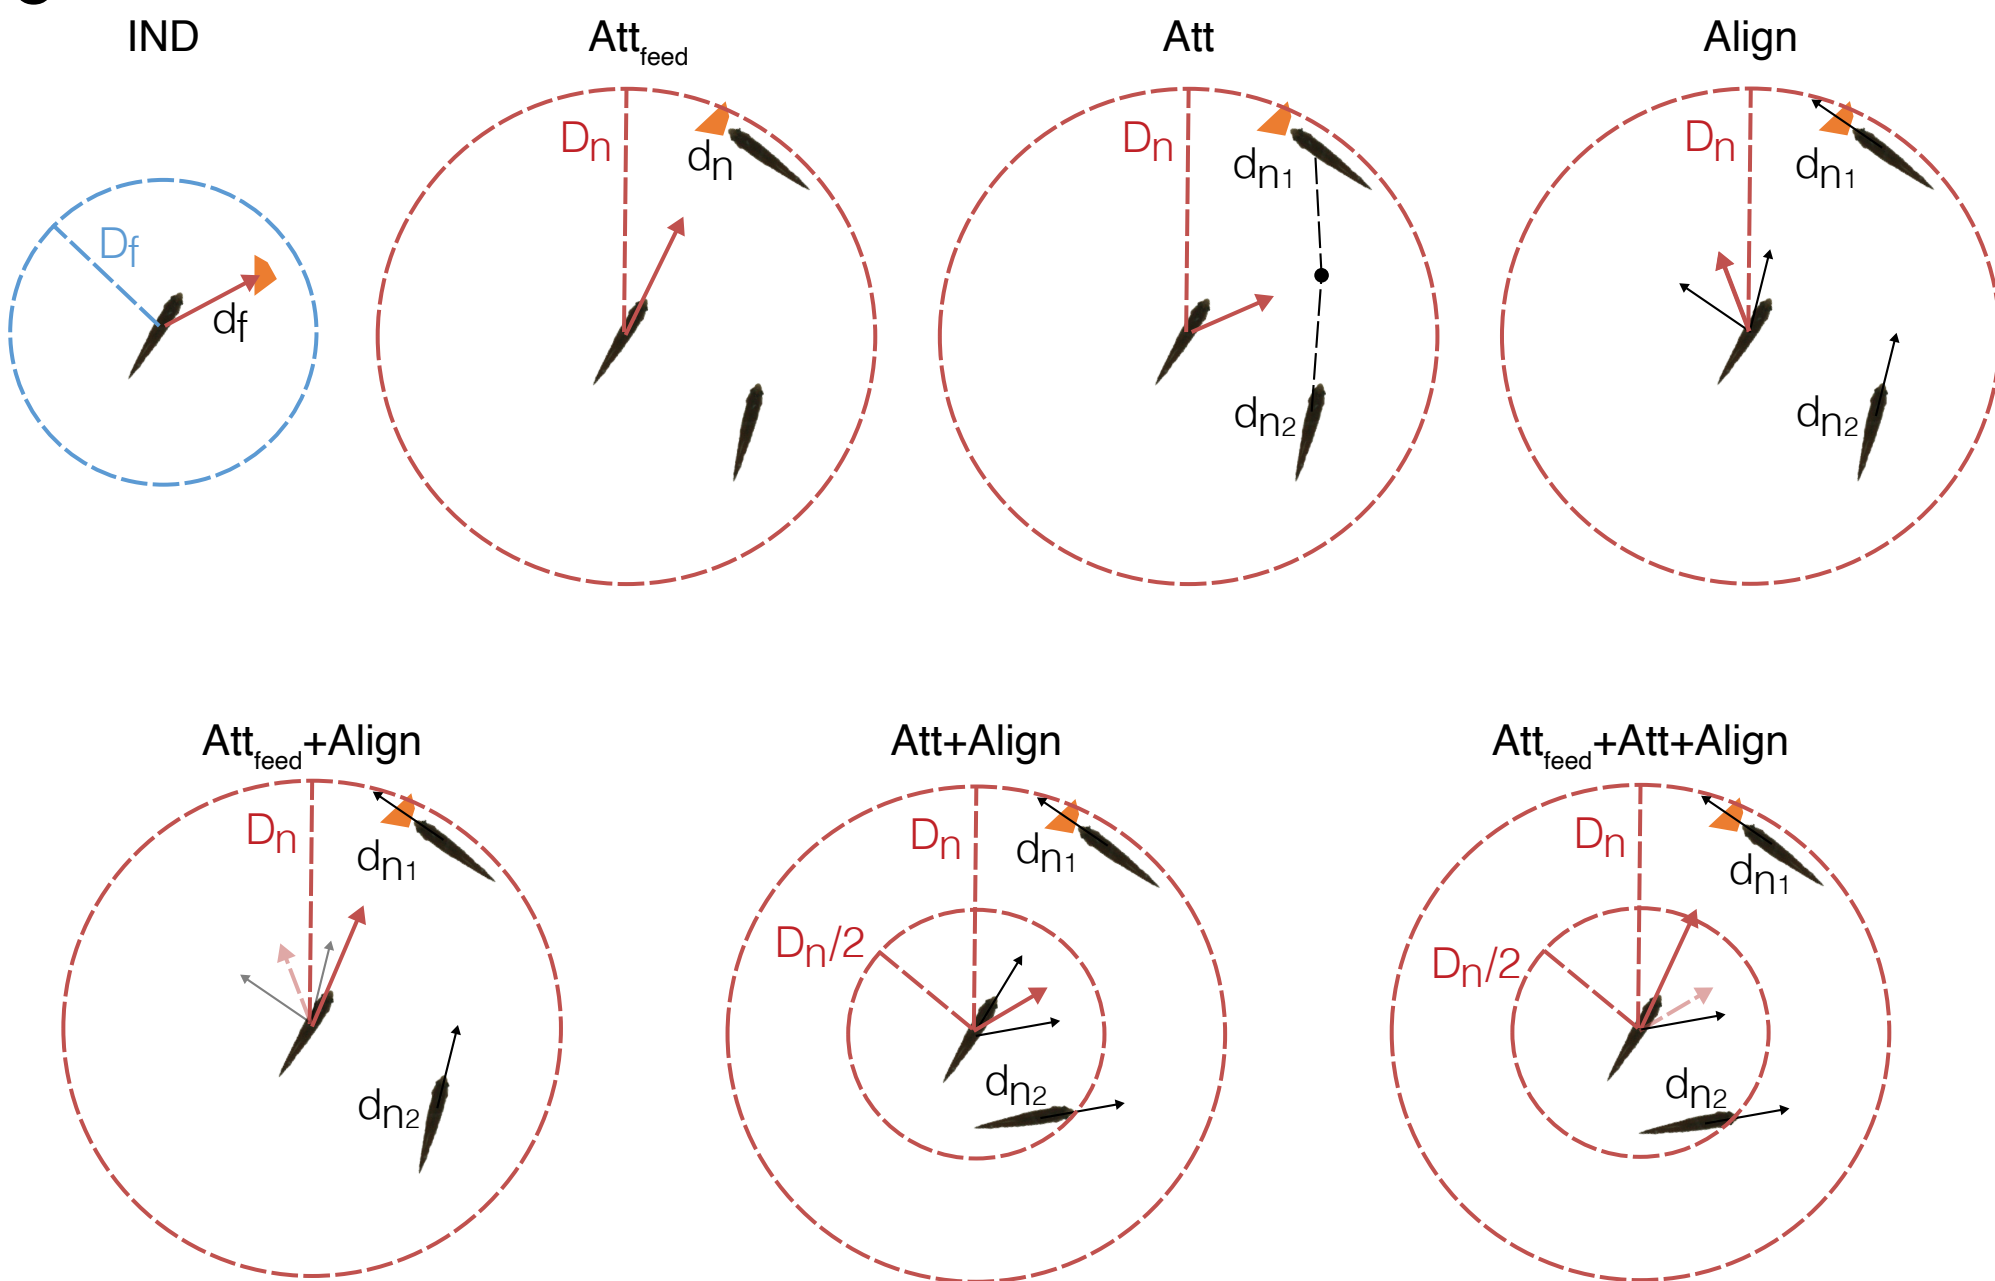

Supplement: supp [file elife-56196-supp-v1.zip]

# A

## Align model

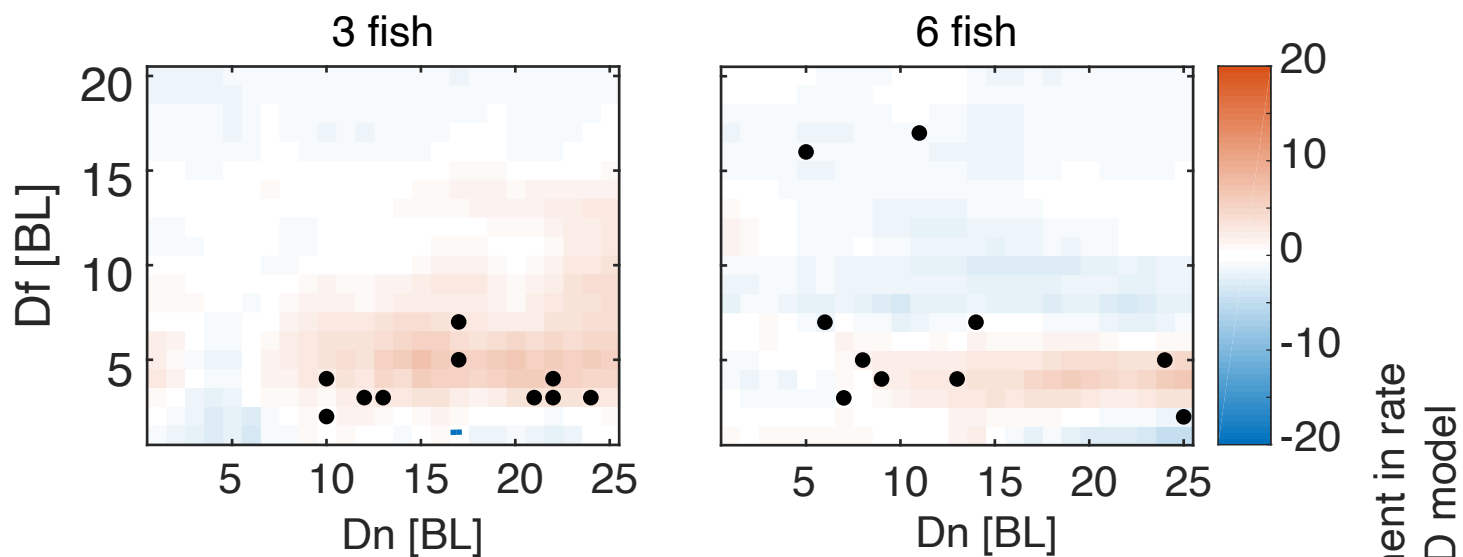

## Att model

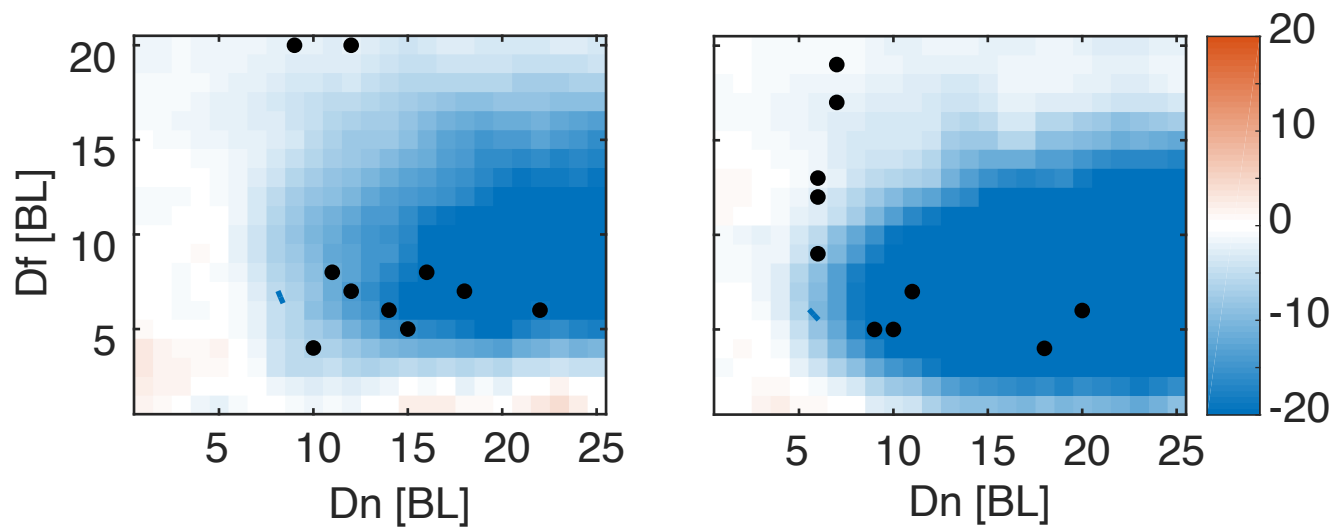

# B

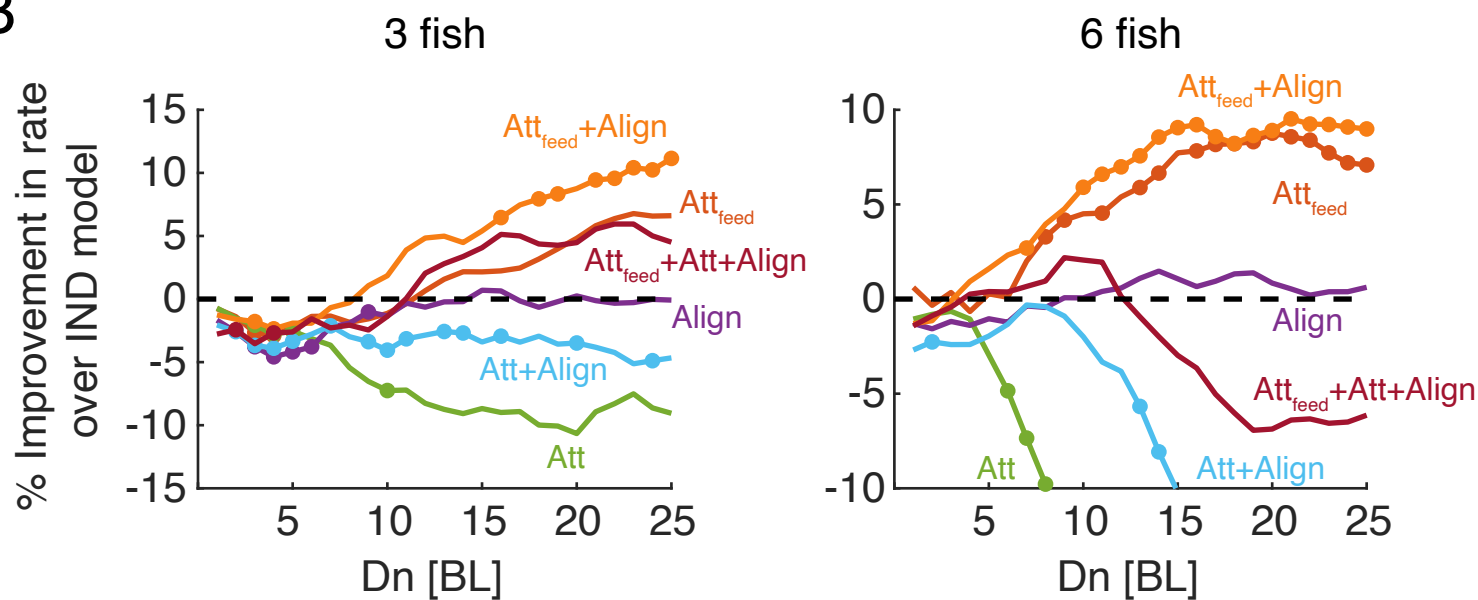

Supplement: supp [file elife-56196-supp-v1.zip]

A.

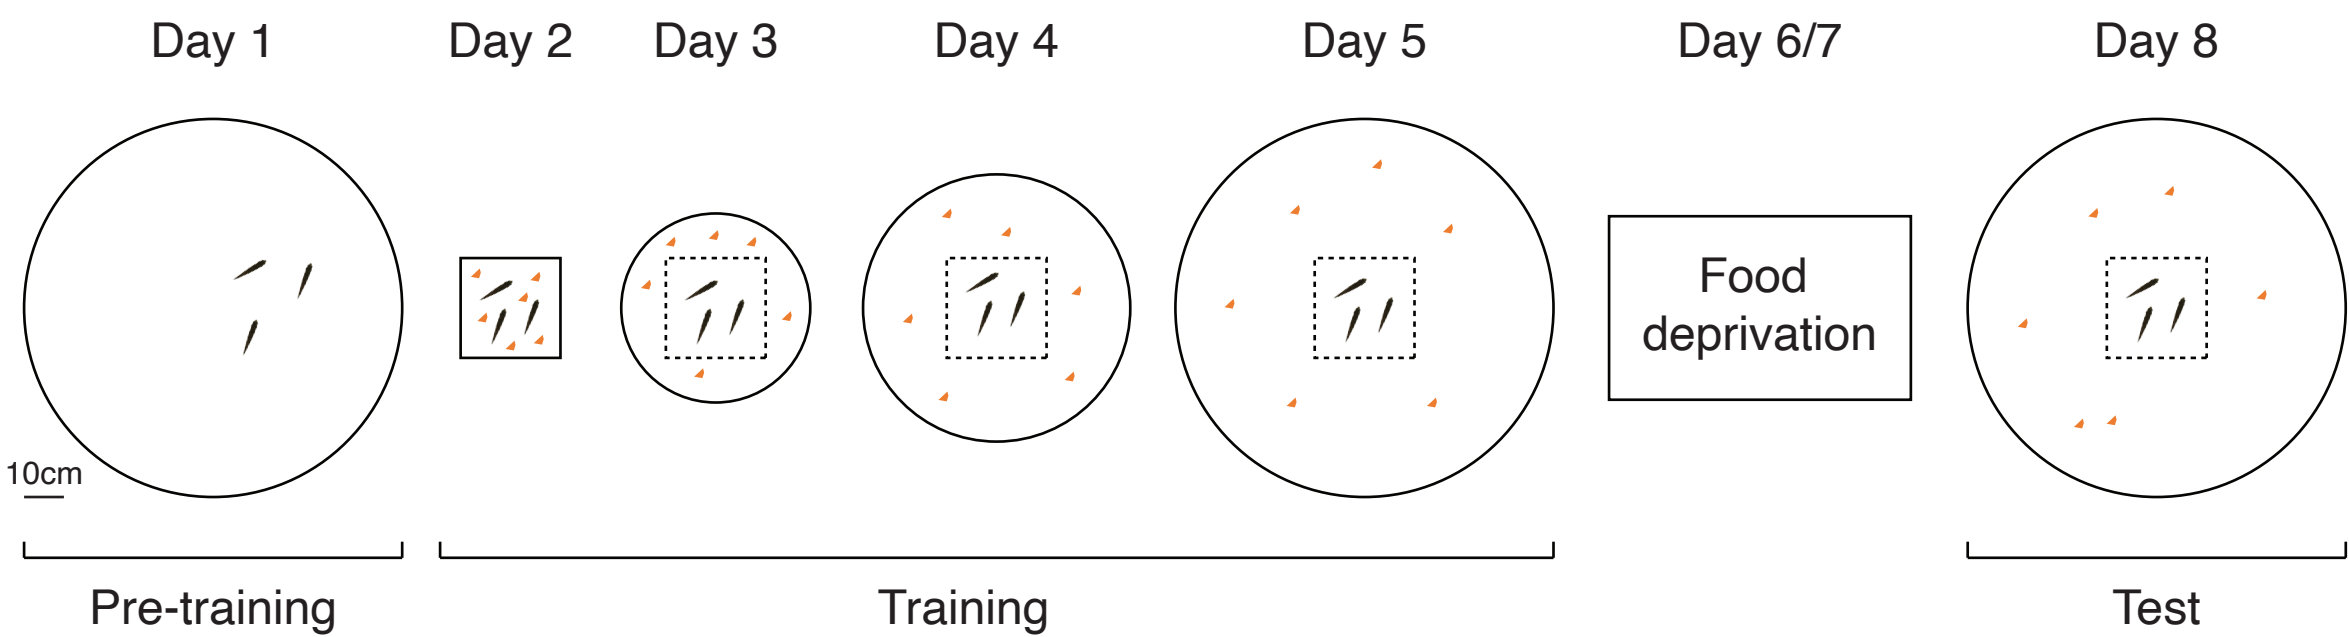

B.

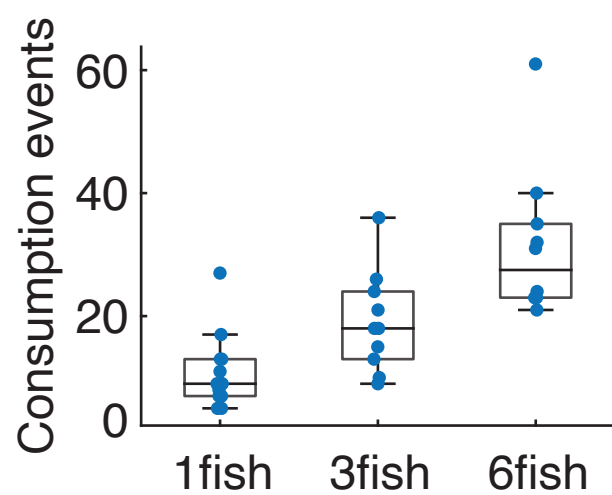

C.

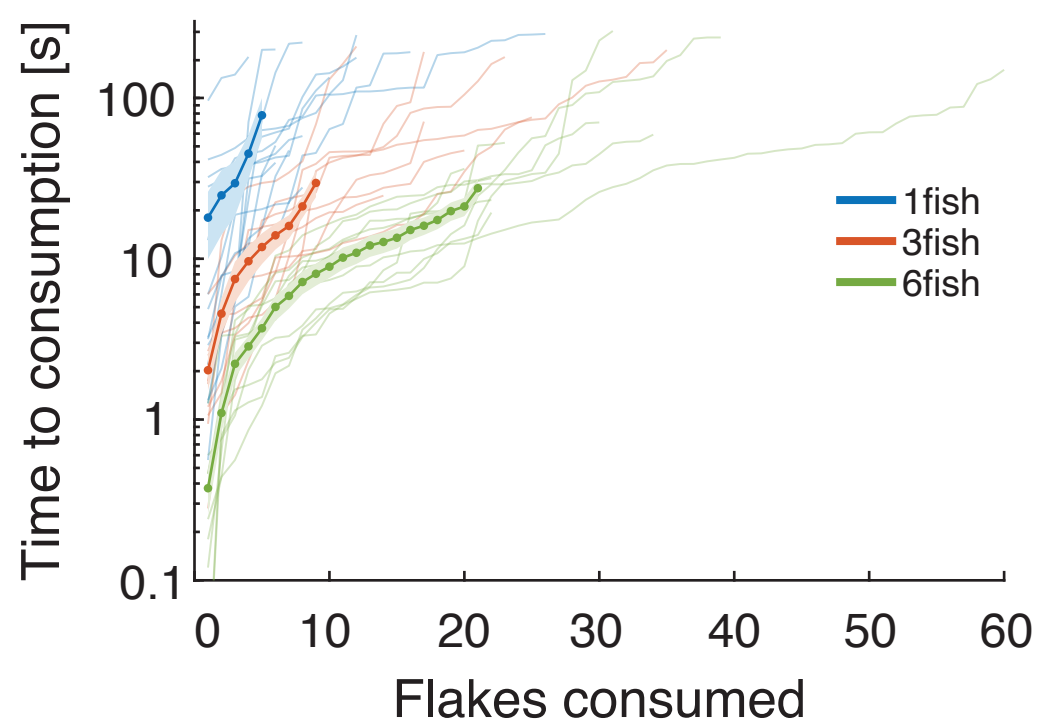

D.

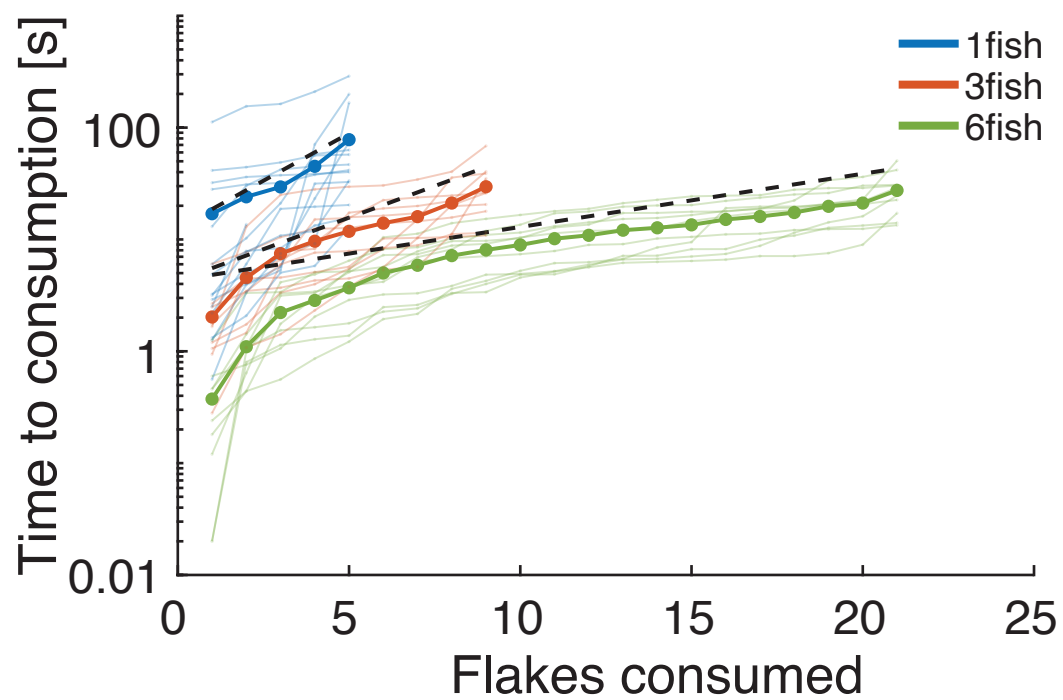

E.

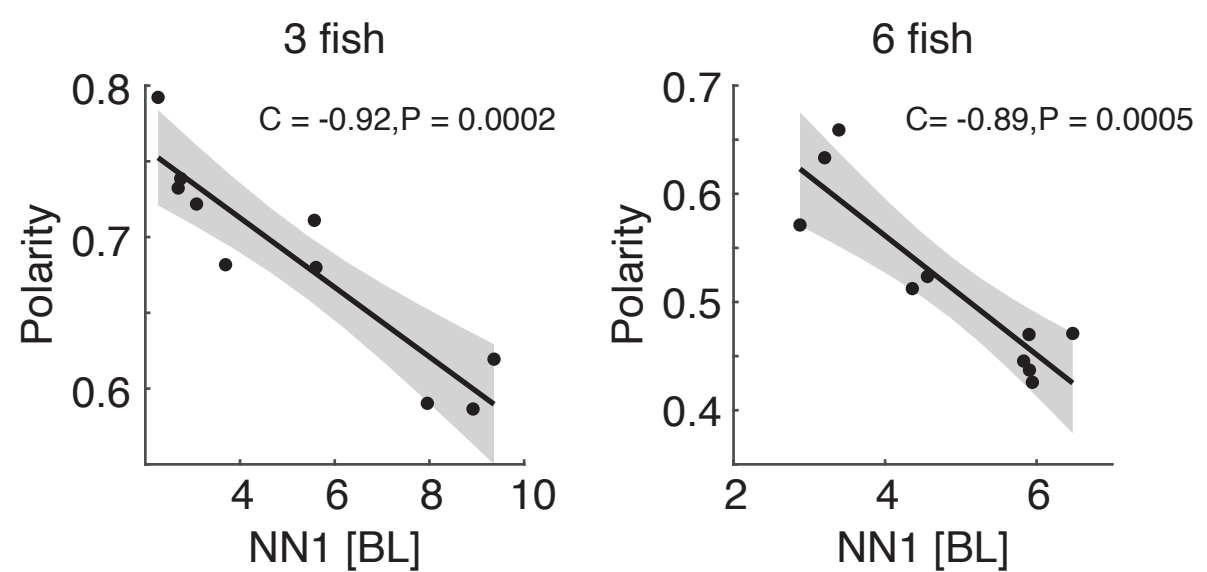

Supplement: supp [file elife-56196-supp-v1.zip]

**A**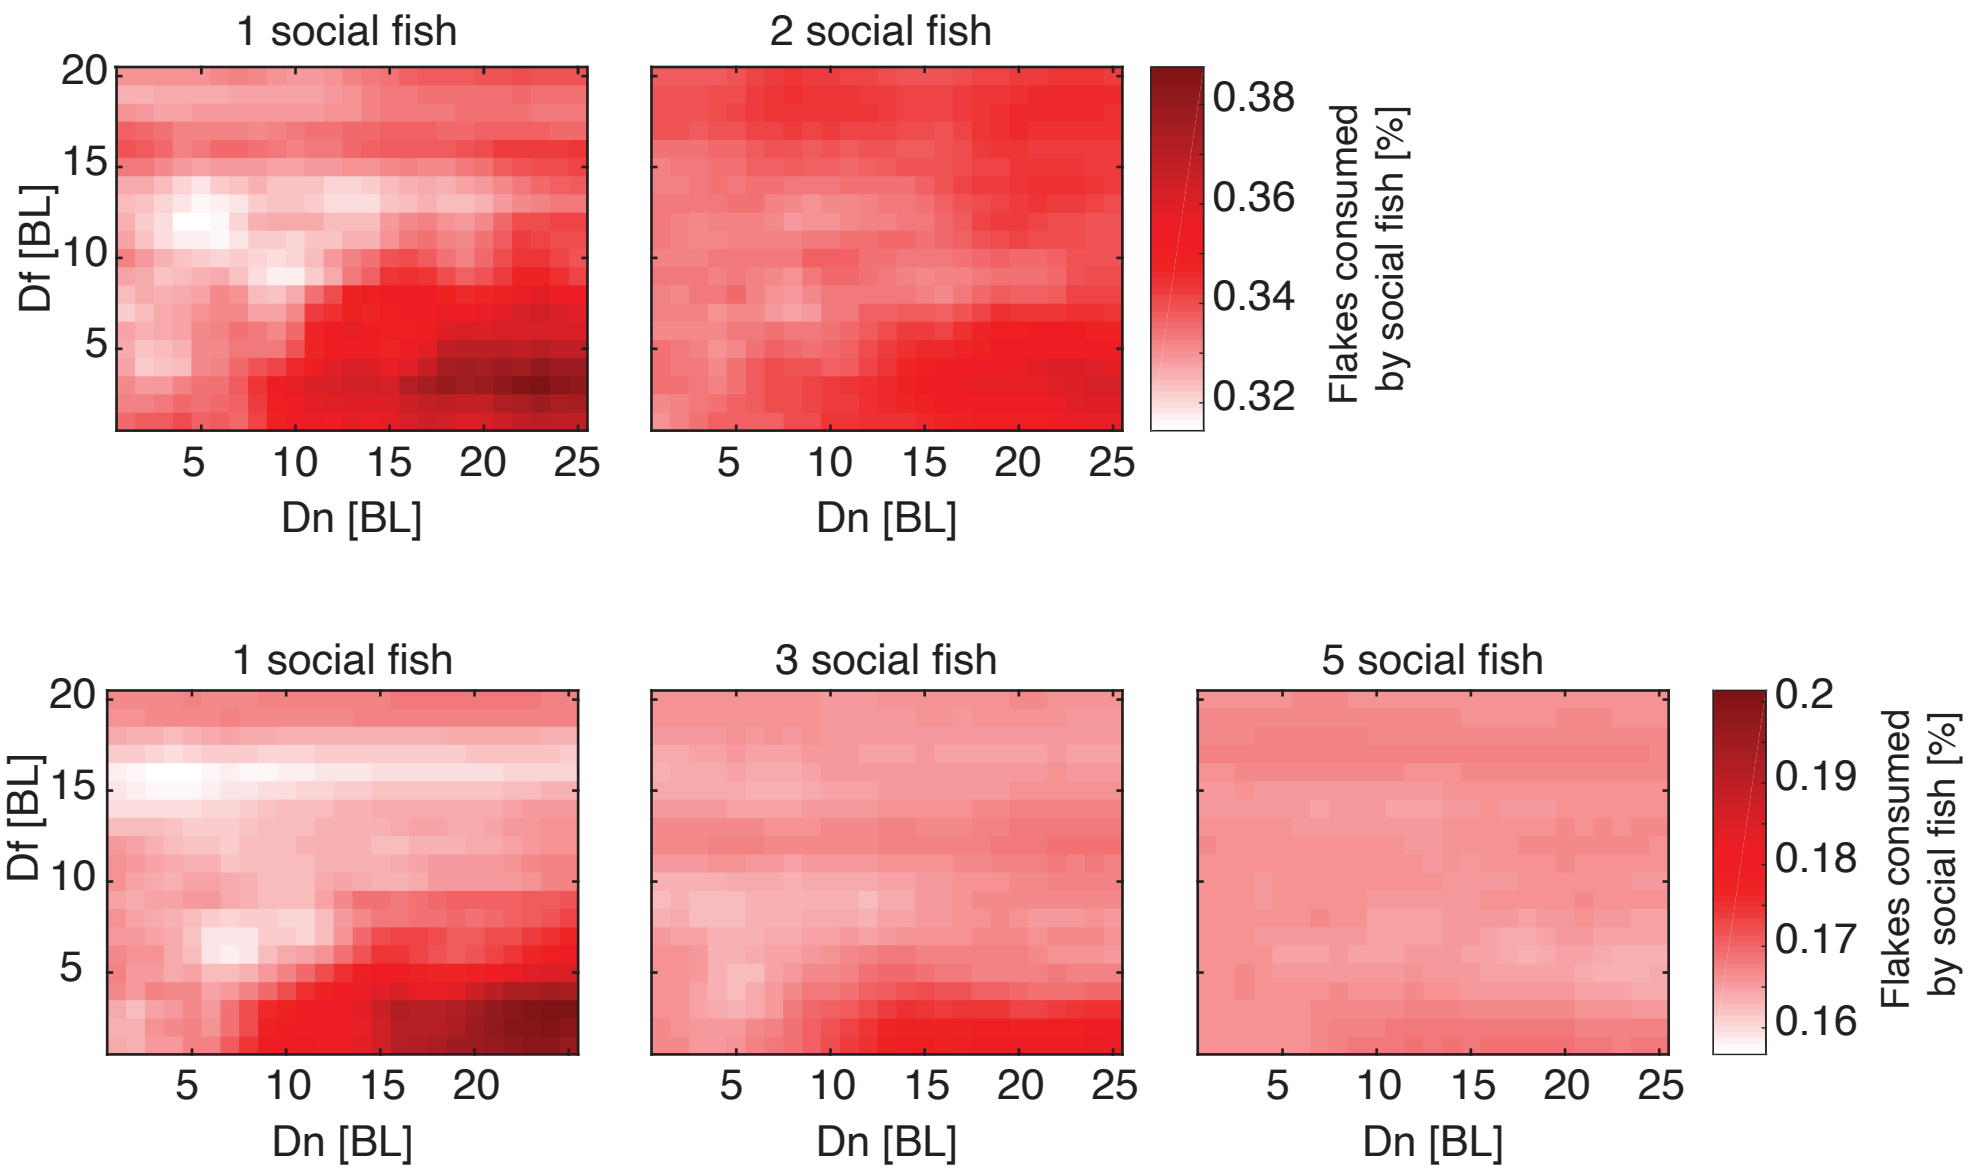

Supplement: supp [file elife-56196-supp-v1.zip]

A.

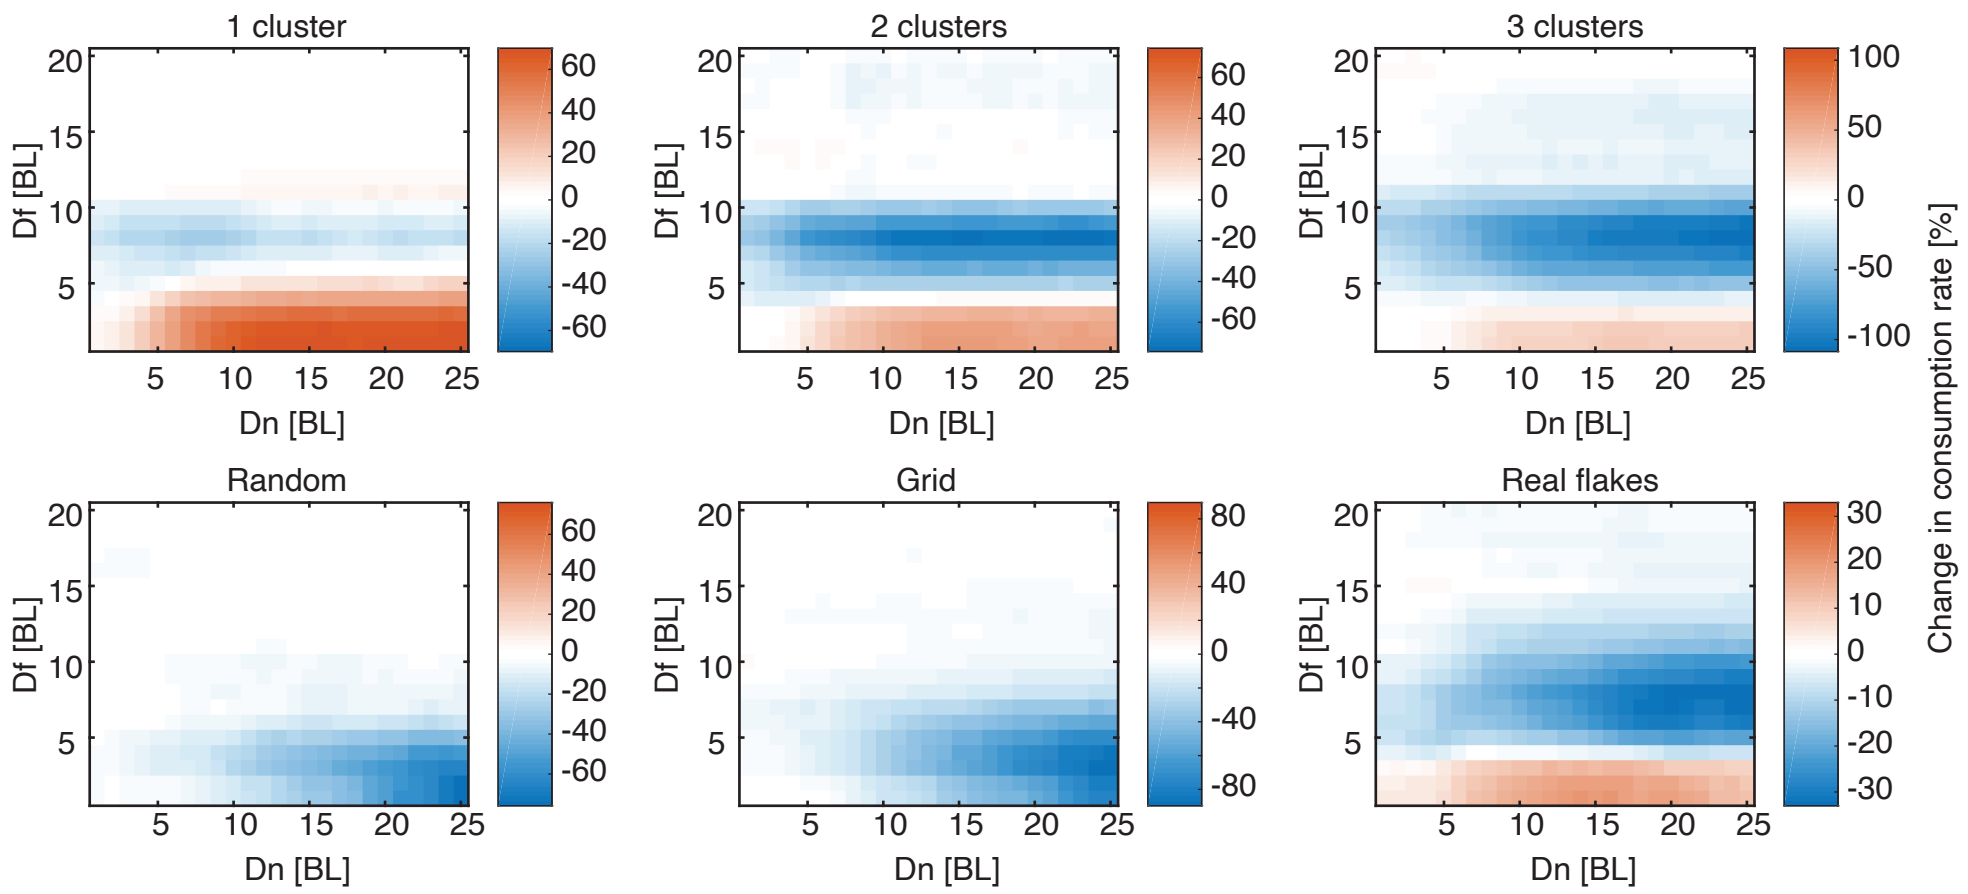

B.

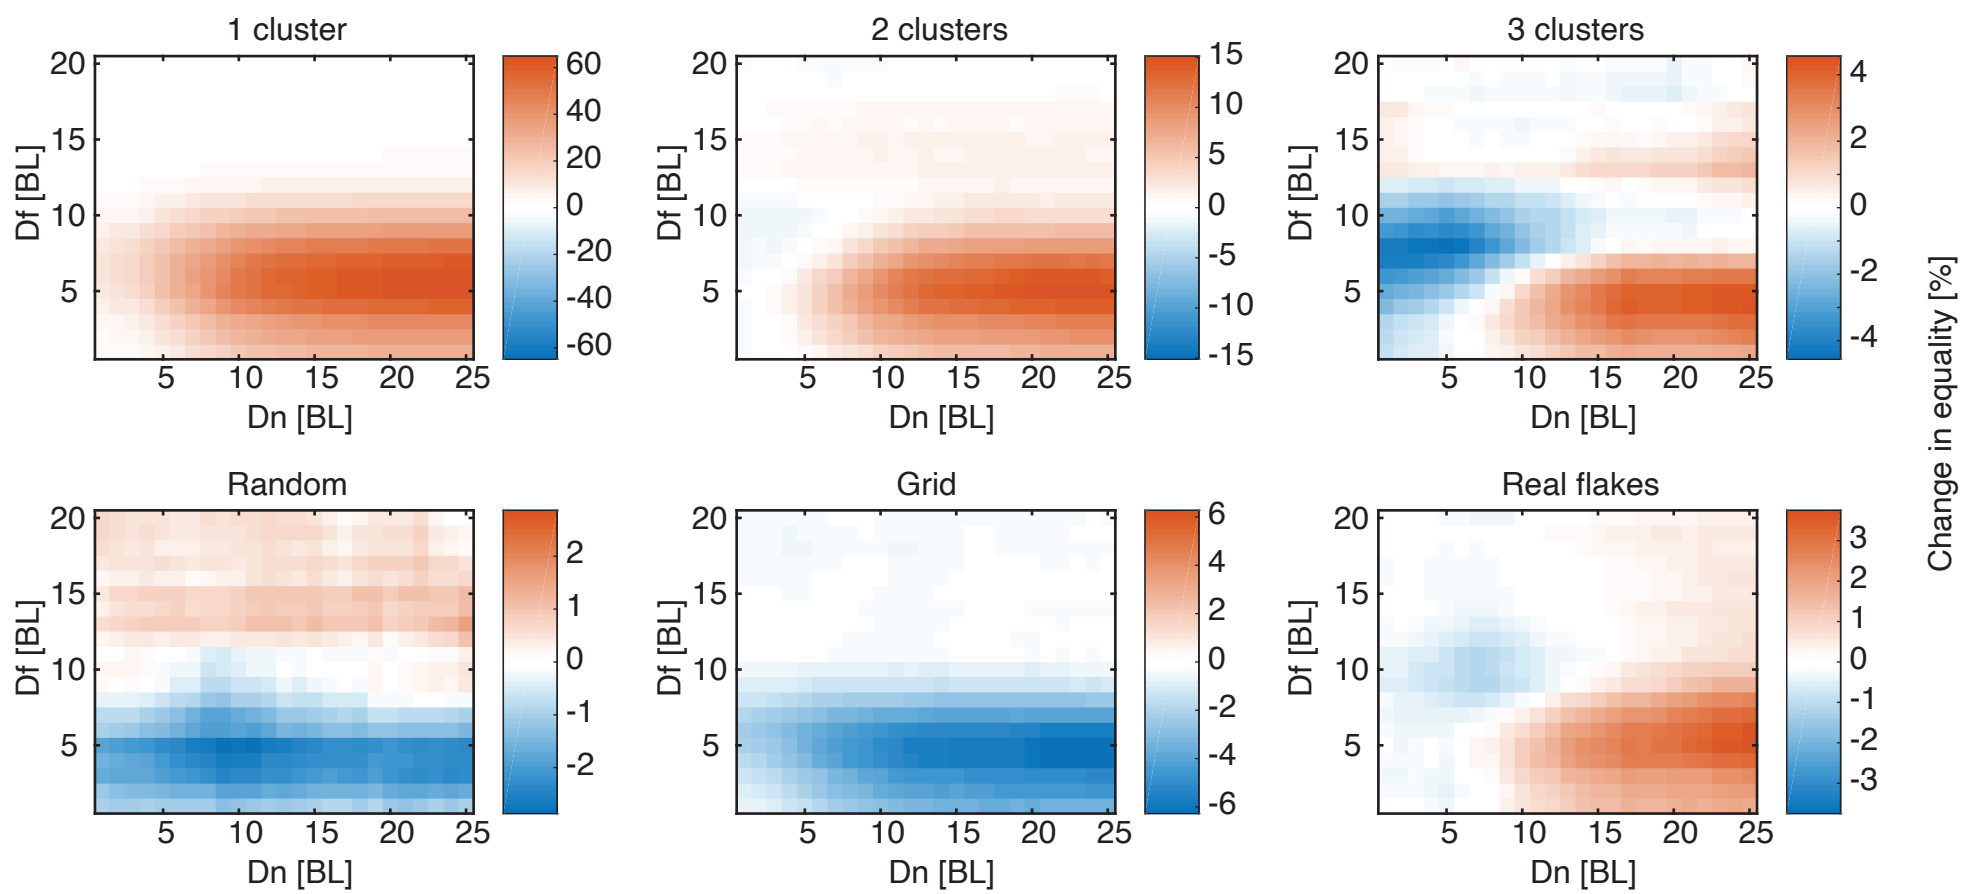

Supplement: supp [file elife-56196-supp-v1.zip]

A.

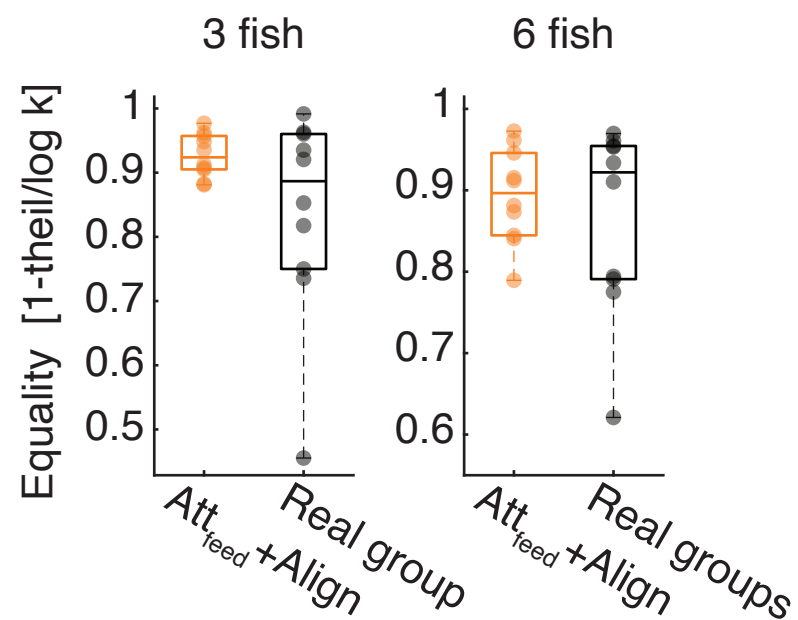

B

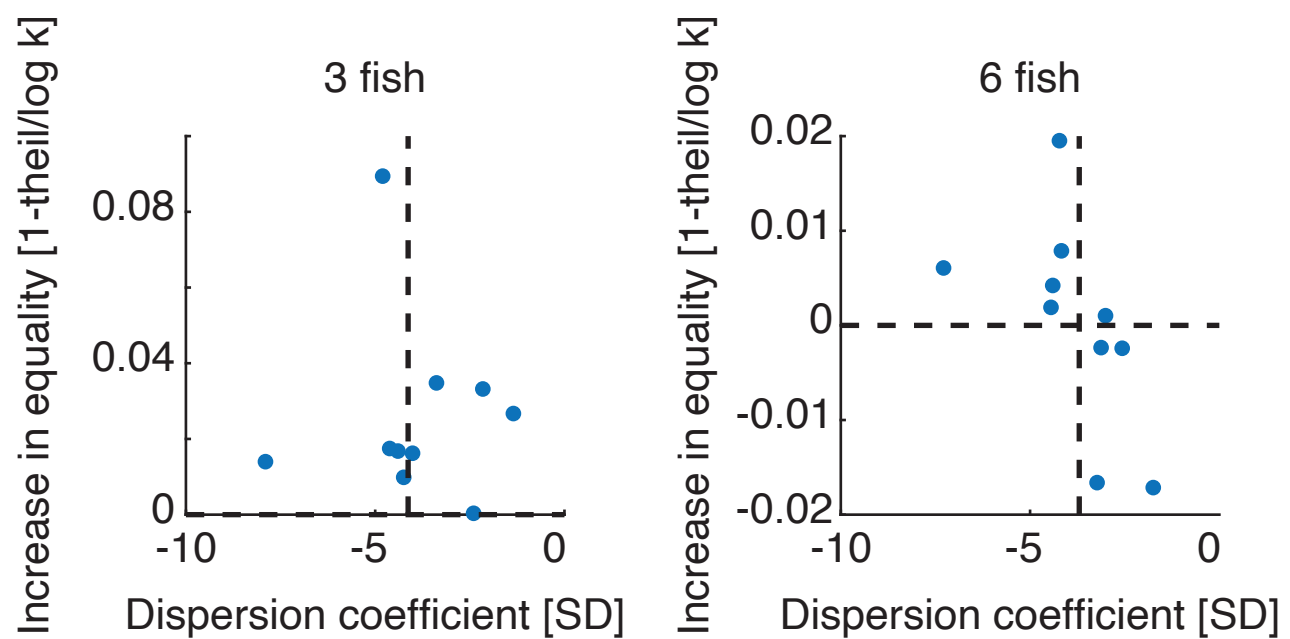

C

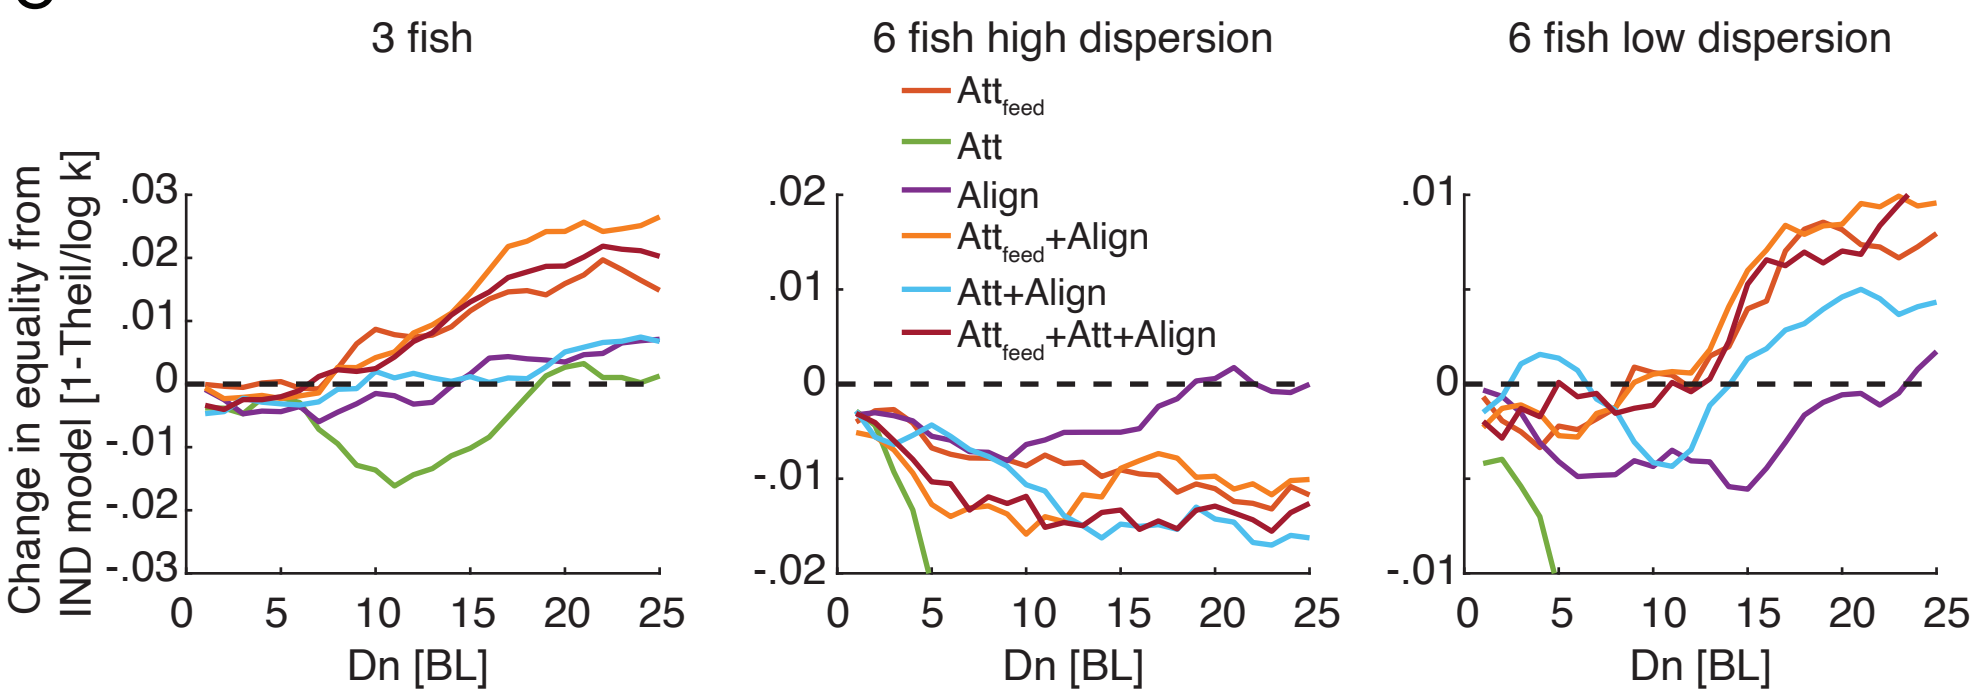

D.

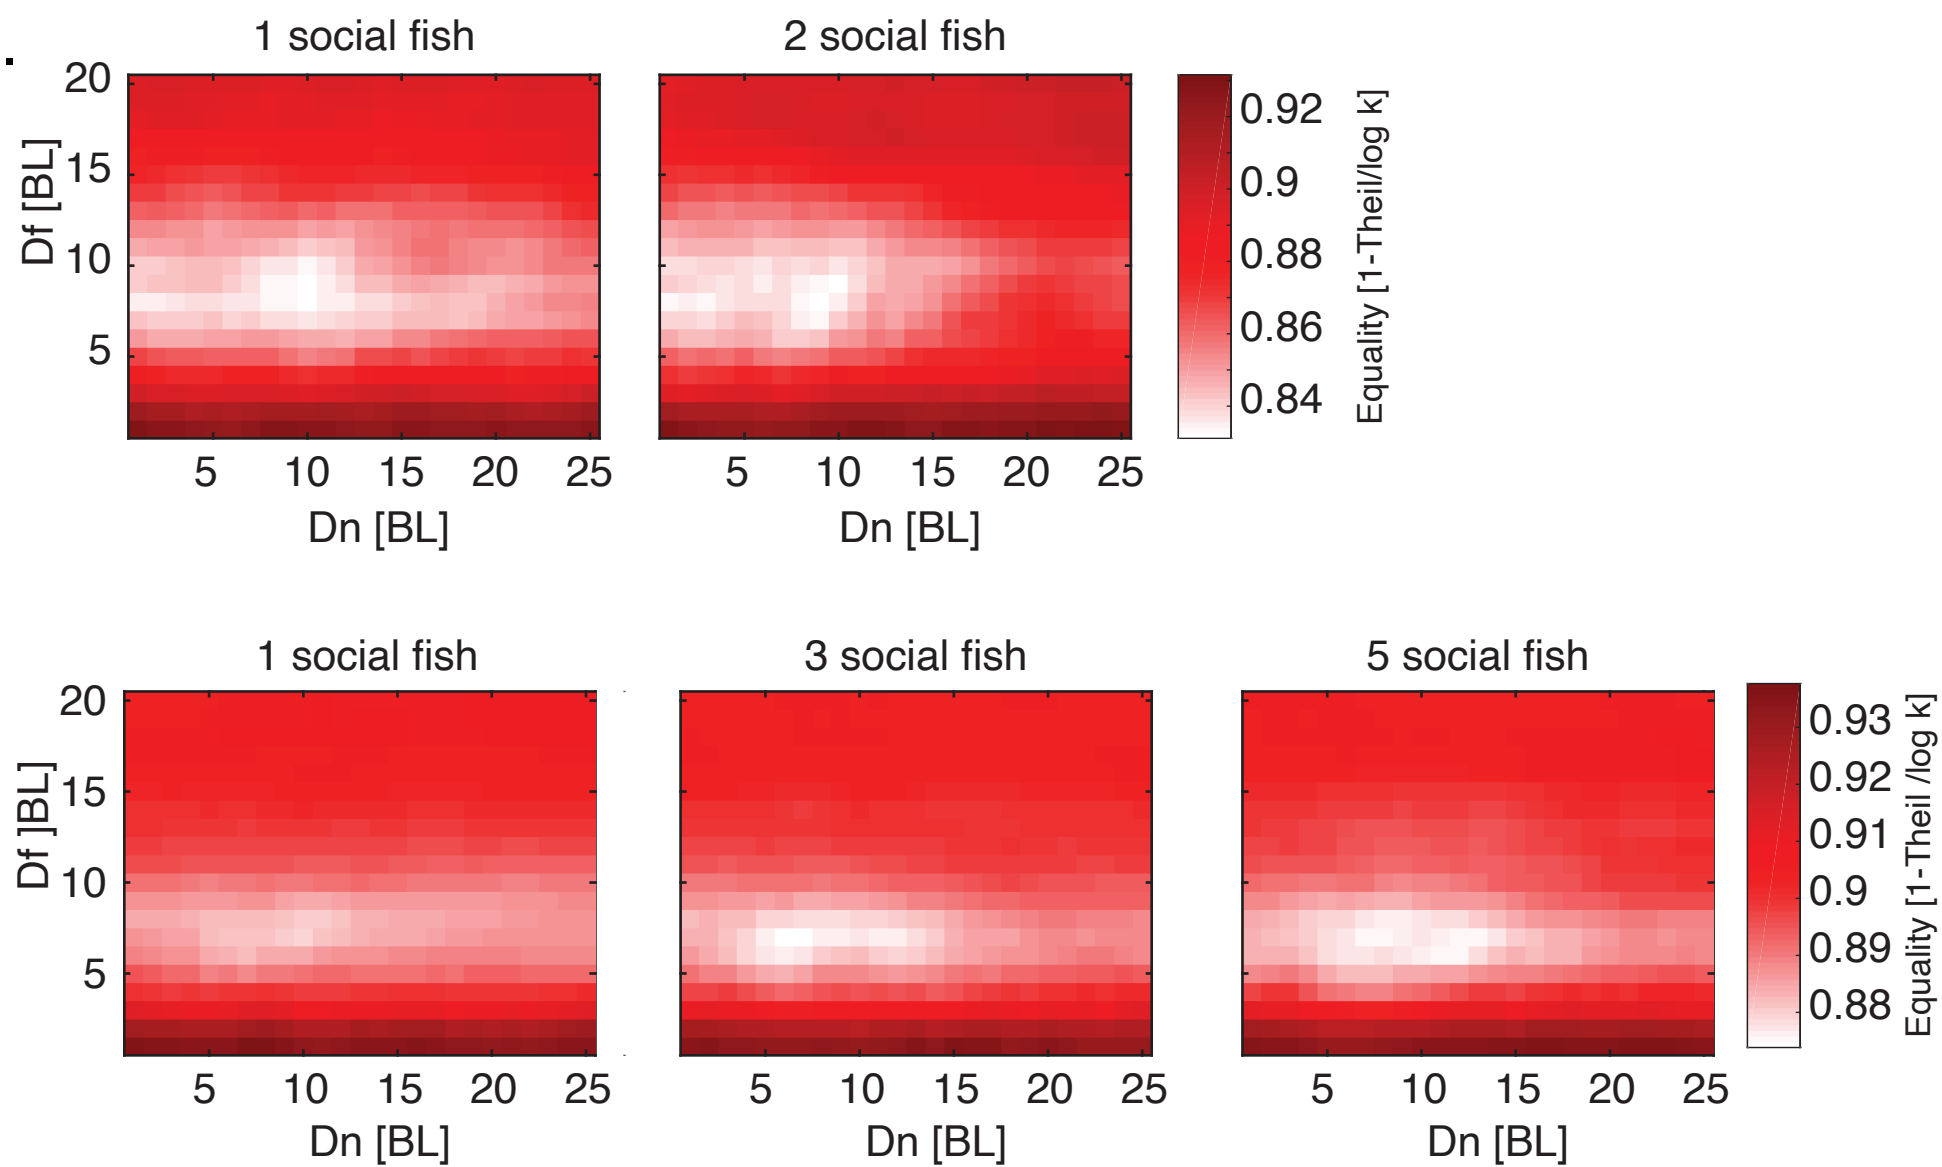

Supplement: supp [file elife-56196-supp-v1.zip]

A

6 fish

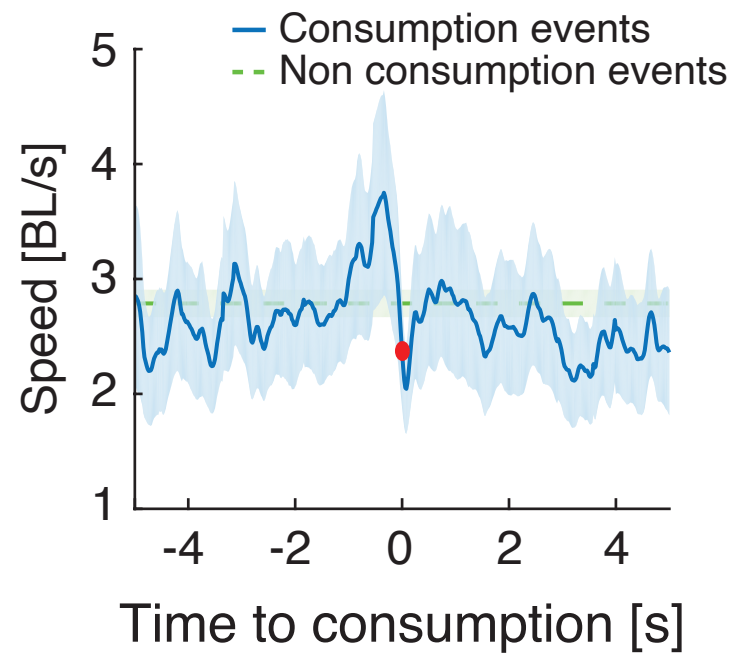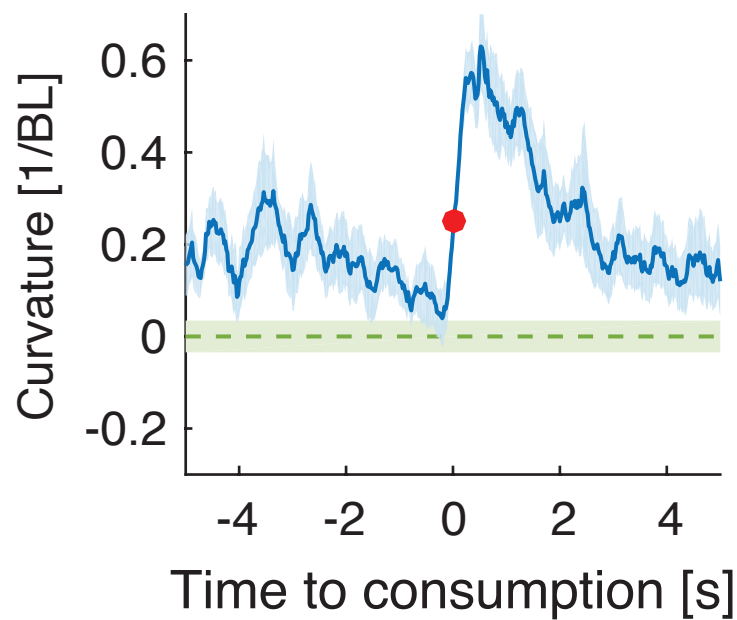

B

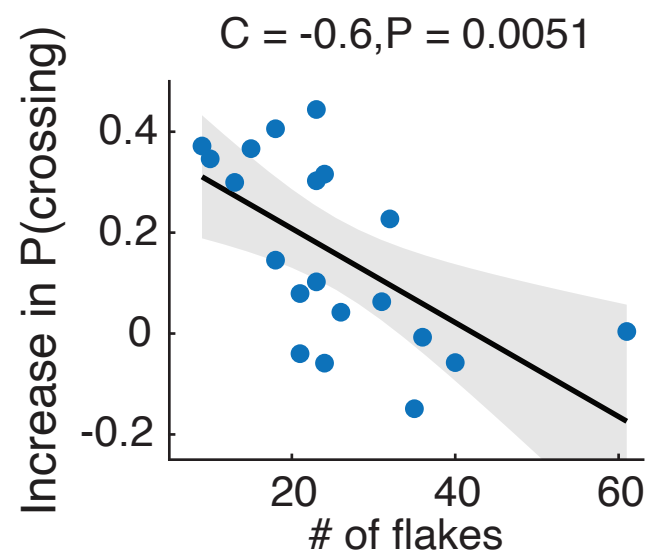

C

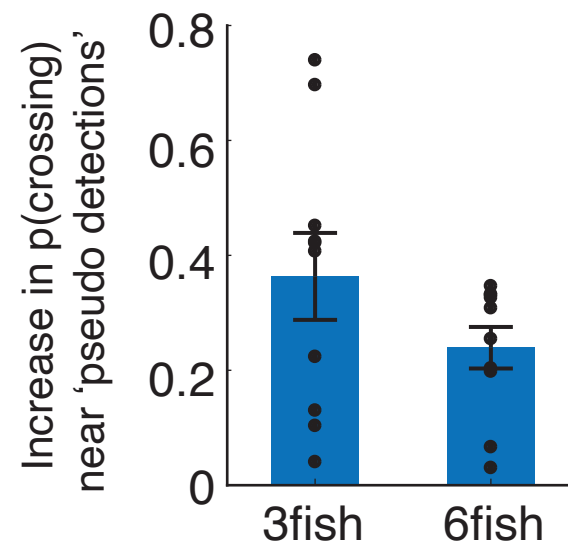

D

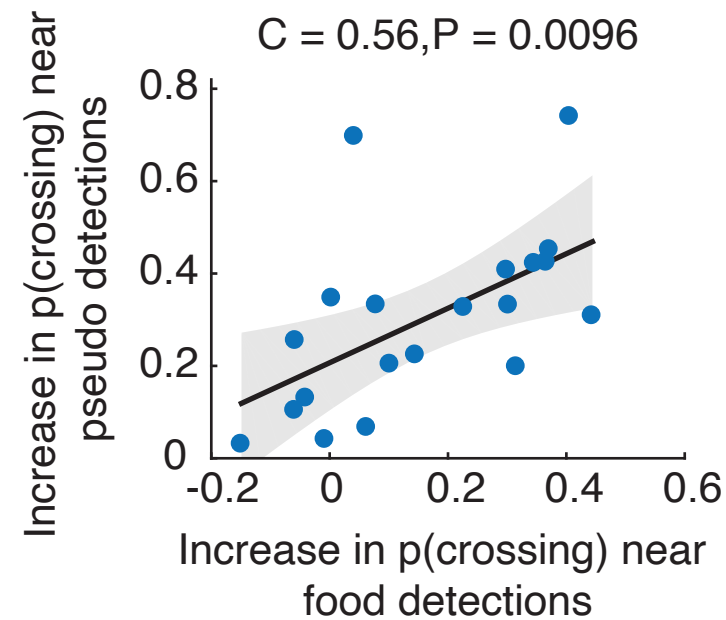

Supplement: supp [file elife-56196-supp-v1.zip]
